# Supplementary material
Source: MDPI journal article supplement (https://www.mdpi.com/1999-4907/10/5/459)
Supplement: s1 [file s1]

## Sheet: OTU (2)
				Supplementary File 1
				Table 1. Relative abundances of OTU sequences in different Pinus spp. from different countries (Turkey, Sweden, USA and Portugal).
				⃰ number of operational Taxonomic Units representing each ID assigned for a taxon
				ID	Taxonomy	n°OTUS ⃰	Turkey							Sweden			USA							Portugal
							P. pinaster	P. nigra subsp. pallasiana	P. brutia	P. sylvestris	P. radiata	P. halepensis	P. pinea	P. sylvestris	P. sylvestris	P. sylvestris	P. sylvestris	P. thunbergii	P. patula	P. taeda	P. densiflora	P. radiata	P. elliottii	P. strobus	P. mugo	P. pinaster	P. sylvestris	P. radiata	P. pinea
	Legend						PS1	PS2	PS3	PS5	PS6	PS7	PS26	PS10	PS11	PS12	PS13	PS14	PS15	PS16	PS17	PS18	PS19	PS20	PS21	PS22	PS23	PS24	PS25
				C1	Absidia glauca	1
	Colur	N° of reads		C2	Acremonium hansfordii	1
1		>10000		C3	Acremonium sp	4
2		1001-10000		C4	Agaricaceae sp	2
3		201-1000		C5	Agaricales sp	3
4		2-100		C6	Agarico stilbomycetes sp	1
5		0		C7	Agaricomycetes sp	4
				C8	Agaricus bisporus	1
				C9	Ajellomycetaceae sp	2
				C10	Aleurodiscs uaurantius	1
				C11	Alternaria alternata	9
				C12	Alternaria arborescens	1
				C13	Alternaria compacta	1
				C14	Alternaria dianthi	1
				C15	Alternaria ethzedia	1
				C16	Alternaria infectoria	4
				C17	Alternaria longipes	1
				C18	Alternaria rosae	1
				C19	Alternaria sp	37
				C20	Alternaria tenuissima	24
				C21	Ambrosiella sp	1
				C22	Amphisphaeriaceae sp	1
				C23	Annulohypoxylon multiforme	1
				C24	Apiotrichum porosum	1
				C25	Archaeorhizomyces sp	2
				C26	Arthoniomycetes sp	1
				C27	Arthrinium phaeospermum	1
				C28	Ascochyta hordei	1
				C29	Ascochyta rabiei	2
				C30	Ascomycota sp	64
				C31	Aspergillus amstelodami	1
				C32	Aspergillus conicus	1
				C33	Aspergillus flavus	6
				C34	Aspergillus fumigatus	1
				C35	Aspergillus niger	1
				C36	Aspergillus parvulus	1
				C37	Aspergillus penicillioides	1
				C38	Aspergillus sp	4
				C39	Aspergillus tubingensis	1
				C40	Aspergillus versicolor	1
				C41	Aspergillus xerophilus	1
				C42	Athelia sp	1
				C43	Aureobasidium melanogenum	1
				C44	Aureobasidium pullulans	5
				C45	Aureobasidium sp	5
				C46	Auriculariales sp	1
				C47	Baeospora myosura	1
				C48	Ballistosporo mycesasicola	1
				C49	Bannoa ogasawarensis	1
				C50	Bartalinia robillardoides	1
				C51	Basidiomycota sp	19
				C52	Beauveria felina	1
				C53	Belonidium sulphureum	1
				C54	Bensingtonia yamatoana	1
				C55	Bipolarimicropus	1
				C56	Biscogniauxia nummularia	1
				C57	Blumeria graminis	1
				C58	Botryobambusa fusicoccum	1
				C59	Botryosphaeria dothidea	7
				C60	Botryosphaeria sp	1
				C61	Botryosphaeria stevensii	3
				C62	Botryosphaeriaceae sp	1
				C63	Botryosphaeriales sp	4
				C64	Botrytis sp	1
				C65	Buckleyzyma armeniaca	1
				C66	Buckleyzyma sp	2
				C67	Bullera sp	2
				C68	Bulleromycealbus	1
				C69	Cadophora malorum	1
				C70	Cadophora sp	3
				C71	Caloplaca atroflava	1
				C72	Camarosporium brabeji	1
				C73	Camptophora hylomeconis	1
				C74	Camptophora sp	1
				C75	Candida caryicola	1
				C76	Candida elateridarum	1
				C77	Candida homilentoma	1
				C78	Candida norvegica	1
				C79	Candida oceani	1
				C80	Candida parapsilosis	1
				C81	Candida sequanensis	1
				C82	Candida sp	6
				C83	Candida tropicalis	1
				C84	Candida zeylanoides	1
				C85	Cantharellales sp	4
				C86	Capnobotryella sp	1
				C87	Capnodiales sp	15
				C88	Capnodium sp	1
				C89	Capronia acutiseta	1
				C90	Capronia epimyces	3
				C91	Capronia kleinmondensis	2
				C92	Capronia sp	1
				C93	Catenulostroma protearum	1
				C94	Cenangium acuum	1
				C95	Cenangium japonicum	1
				C96	Cephalotrichum stemonitis	1
				C97	Ceratobasidiaceae sp	9
				C98	Ceratobasidium sp	4
				C99	Cerrena unicolor	1
				C100	Chaetomidium fimeti	1
				C101	Chaetomium sp	1
				C102	Chaetothyriales sp	10
				C103	Chaetothyriomycetidae	1
				C104	Chalara sp	2
				C105	Chalastospora gossypii	1
				C106	Chionosphaera cuniculicola	1
				C107	Chytridiomycota sp	1
				C108	Cistella sp	1
				C109	Cladophialophora sp	4
				C110	Cladosporium cladosporioides	7
				C111	Cladosporium herbarum	3
				C112	Cladosporium oxysporum	1
				C113	Cladosporium sp	2
				C114	Cladosporium sphaerospermum	2
				C115	Clavispora sp	3
				C116	Clitopilus sp	1
				C117	Clonostachyrosea	3
				C118	Colacogloea falcata	1
				C119	Colacogloea philyla	2
				C120	Colacogloea sp	1
				C121	Colletotrichum higginsianum	1
				C122	Collophora sp	4
				C123	Confertobasidium sp	2
				C124	Coniella granati	1
				C125	Coniochaeta sp	1
				C126	Coniochaetales sp	2
				C127	Coniophora arida	3
				C128	Coniophora olivacea	2
				C129	Coniophora puteana	2
				C130	Coniosporium sp	1
				C131	Coniothyrium sp	1
				C132	Conotrema sp	1
				C133	Coprinus sp	1
				C134	Cornuvesica magnispora	1
				C135	Corticiaceae sp	3
				C136	Cosmospora coccinea	1
				C137	Cosmospora obscura	2
				C138	Cosmospora sp	2
				C139	Cryptococcus allantoinivorans	1
				C140	Cryptococcus cylindricus	1
				C141	Cryptococcus dimennae	1
				C142	Cryptococcus heimaeyensis	1
				C143	Cryptococcus laurentii	1
				C144	Cryptococcus pinus	3
				C145	Cryptococcus s sp	17
				C146	Cryptococcus skinneri	1
				C147	Cryptococcus tephrensis	1
				C148	Cryptococcus victoriae	3
				C149	Cunninghamella sp	1
				C150	Curvibasidium cygneicollum	3
				C151	Curvibasidium pallidicorallinum	1
				C152	Curvibasidium rogersii	1
				C153	Cutaneotrichosporon sp	1
				C154	Cyberlindnera amylophila	1
				C155	Cyberlindnera sp	1
				C156	Cylindrodendrum sp	1
				C157	Cyphellophora europaea	1
				C158	Cyphellophora sessilis	1
				C159	Cyphellophora sp	1
				C160	Cyphellopsianomala	1
				C161	Cystobasidiomycetes sp	2
				C162	Cystobasidiopsilactophilus	2
				C163	Cystobasidium psychroaquaticum	1
				C164	Cystobasidium sp	5
				C165	Cystofilobasidiaceae sp	2
				C166	Cystofilobasidiales sp	1
				C167	Cystofilobasidium capitatum	2
				C168	Cystofilobasidium sp	6
				C169	Cystostereum heteromorphum	1
				C170	Cytospora populina	1
				C171	Cytospora ribis	1
				C172	Cytospora sp	2
				C173	Dacrymyces chrysospermus	1
				C174	Dacrymyces unisporus	1
				C175	Daldinia concentrica	1
				C176	Debaryomyces hansenii	3
				C177	Dermateaceae sp	1
				C178	Derxomyces sp	1
				C179	Devriesia americana	1
				C180	Devriesia sp	1
				C181	Diaporthaceae sp	2
				C182	Diaporthe cotoneastri	1
				C183	Diaporthe cynaroidis	1
				C184	Diaporthe foeniculina	1
				C185	Diaporthe hongkongensis	1
				C186	Diaporthe nobilis	1
				C187	Diaporthe passiflorae	1
				C188	Diaporthe phaseolorum	2
				C189	Diaporthe rudis	2
				C190	Diaporthe sp	12
				C191	Diatrypella pulvinata	1
				C192	Dicarpella dryina	1
				C193	Didymella sp	3
				C194	Didymellaceae sp	2
				C195	Dinemasporium morbidum	1
				C196	Dioszegia rishiriensis	1
				C197	Dioszegia sp	5
				C198	Dioszegia takashimae	1
				C199	Diplodia agrifolia	1
				C200	Diplodia corticola	1
				C201	Diplodia cupressi	1
				C202	Diplodia intermedia	2
				C203	Diplodia pseudoseriata	1
				C204	Diplodia seriata	4
				C205	Diplodia sp	3
				C206	Discocainia nervalis	1
				C207	Discocistella sp	1
				C208	Dothichiza sp	1
				C209	Dothidea sp	2
				C210	Dothideales sp	2
				C211	Dothideomycetes sp	24
				C212	Dothideomycetidae	1
				C213	Dothioraceae sp	3
				C214	Dothiorella iberica	1
				C215	Dothiorella sempervirentis	1
				C216	Dothiorella sp	1
				C217	Entylomatales sp	1
				C218	Eocronartium sp	1
				C219	Epicoccum nigrum	2
				C220	Epicoccum sp	2
				C221	Eremascualbus	1
				C222	Erysiphe adunca	1
				C223	Erythrobasidiales sp	2
				C224	Erythrobasidium hasegawianum	3
				C225	Eucasphaeria capensis	1
				C226	Eucasphaeria sp	2
				C227	Eurotiales sp	10
				C228	Eurotiomycetes sp	9
				C229	Eutypa lata	2
				C230	Eutypa sp	1
				C231	Exidia glandulosa	1
				C232	Exobasidiaceae sp	1
				C233	Exobasidiales sp	1
				C234	Exobasidium dubium	1
				C235	Exobasidium maculosum	4
				C236	Exobasidium rostrupii	1
				C237	Exophiala bergeri	1
				C238	Exophiala capensis	1
				C239	Exophiala eucalyptorum	1
				C240	Exophiala heteromorpha	2
				C241	Exophiala sideris	2
				C242	Exophiala sp	6
				C243	Exophiala xenobiotica	1
				C244	Farysia acheniorum	1
				C245	Fellomyces chinensis	1
				C246	Fellomyces penicillatus	1
				C247	Fellomyces sp	2
				C248	Fellomyces thailandicus	1
				C249	Fellozyma inositophila	1
				C250	Fibulobasidium inconspicuum	2
				C251	Fibulobasidium murrhardtense	2
				C252	Filobasidiaceae sp	2
				C253	Filobasidium chernovii	1
				C254	Filobasidium magnum	3
				C255	Filobasidium wieringae	4
				C256	Fungi sp	499
				C257	Fusariella sinensis	1
				C258	Fusarium brachygibbosum	1
				C259	Fusarium brasilicum	1
				C260	Fusarium guttiforme	1
				C261	Fusarium incarnatum	1
				C262	Fusarium keratoplasticum	1
				C263	Fusarium oxysporum	3
				C264	Fusarium poae	1
				C265	Fusarium solani	10
				C266	Fusarium sp	19
				C267	Fusarium sporotrichioides	1
				C268	Fuscoporia torulosa	1
				C269	Fusicladium cordae	1
				C270	Fusicladium pini	2
				C271	Fusicolla merismoides	1
				C272	Fusicolla violacea	2
				C273	Geoglossales sp	1
				C274	Gibberella baccata	5
				C275	Gibberella fujikuroi	2
				C276	Gibberella intricans	2
				C277	Gibberella thapsina	1
				C278	Gibberella zeae	1
				C279	Gilbertella persicaria	1
				C280	Gnomonia sp	2
				C281	Gorgomyces honrubiae	1
				C282	Gremmeniella abietina	1
				C283	Hannaella coprosmae	1
				C284	Hannaella oryzae	1
				C285	Hannaella sp	1
				C286	Hansfordia pulvinata	2
				C287	Harzia acremonioides	1
				C288	Harzia cameroonensis	1
				C289	Helotiales sp	23
				C290	Helvella leucomelaena	2
				C291	Hendersonia pinicola	1
				C292	Herpotrichia sp	2
				C293	Herpotrichiellaceae sp	1
				C294	Heteroacanthella acanthophysa	1
				C295	Heyderia sp	1
				C296	Hohenbuehelia sp	1
				C297	Holtermanniella wattica	1
				C298	Humicola sp	1
				C299	Hyalodendriella sp	1
				C300	Hymenochaetaceae sp	1
				C301	Hymenochaete sp	1
				C302	Hymenoscyphufraxineus	1
				C303	Hymenoscyphus sp	1
				C304	Hyphoderma definitum	1
				C305	Hyphodermella corrugata	1
				C306	Hyphodontia radula	2
				C307	Hyphodontia sp	1
				C308	Hyphopichia burtonii	1
				C309	Hypocreales sp	9
				C310	Hypogymnia metaphysodes	1
				C311	Hypogymnia physodes	1
				C312	Hypoxylon fuscum	2
				C313	Hypoxylon macrocarpum	1
				C314	Hysteriaceae sp	1
				C315	Incrucipulum ciliare	1
				C316	Infundichalara microchona	1
				C317	Jattaea sp	4
				C318	Kabatina sp	1
				C319	Knufia aspidiotus	1
				C320	Kockovaella schimae	1
				C321	Kuraishia capsulata	2
				C322	Kurtzmanomycenectairei	1
				C323	Kurtzmanomyces sp	2
				C324	Kwoniella mangrovensis	1
				C325	Lachnellula agassizii	1
				C326	Lachnocladiaceae sp	1
				C327	Lasiodiplodia crassispora	1
				C328	Lasiodiplodia jatrophicola	1
				C329	Lasiodiplodia margaritacea	1
				C330	Lasiodiplodia parva	2
				C331	Lasiodiplodia pseudotheobromae	3
				C332	Lasiodiplodia sp	3
				C333	Lasiodiplodia theobromae	10
				C334	Lasiodiplodia viticola	1
				C335	Latorua caligans	1
				C336	Lecania cyrtella	1
				C337	Lecanicillium sp	1
				C338	Lecanoraceae sp	1
				C339	Lecanoromycetes sp	3
				C340	Lecanoromycetidae	1
				C341	Lecidella wulfenii	1
				C342	Lecythophora sp	1
				C343	Leotiomycetes sp	10
				C344	Leptosphaeriaceae sp	3
				C345	Leucosporidiales sp	2
				C346	Leucosporidiella muscorum	1
				C347	Leucosporidium sp	1
				C348	Lewia sp	3
				C349	Lophiostoma corticola	1
				C350	Lophiostoma fuckelii	1
				C351	Lophiostoma sp	2
				C352	Lophiostomataceae sp	1
				C353	Lophium mytilinum	1
				C354	Lophodermium conigenum	1
				C355	Lophodermium pinastri	1
				C356	Lophodermium seditiosum	2
				C357	Lophodermium sp	1
				C358	Luellia recondita	1
				C359	Malassezia globosa	3
				C360	Malassezia restricta	3
				C361	Malassezia sp	5
				C362	Malassezia sympodialis	1
				C363	Malasseziales sp	1
				C364	Malbranchea cinnamomea	1
				C365	Marasmiaceae sp	1
				C366	Massarina sp	4
				C367	Melanchlenus sp	1
				C368	Melanoleuca sp	1
				C369	Merulicium fusisporum	1
				C370	Meyerozyma sp	1
				C371	Microascubrevicaulis	1
				C372	Microbotryomycetes sp	1
				C373	Microcera larvarum	1
				C374	Microsporomyces pini	2
				C375	Microstromatales sp	2
				C376	Mollisia cinerea	1
				C377	Monochaetia dimorphospora	1
				C378	Monographella cucumerina	1
				C379	Mortierella camargensis	2
				C380	Mortierella reticulata	1
				C381	Mortierellaceae sp	1
				C382	Mortierellales sp	3
				C383	Mrakia aquatica	1
				C384	Mrakia blollopis	1
				C385	Mrakiella sp	2
				C386	Mucor circinelloides	3
				C387	Mucor racemosus	1
				C388	Mucoraceae sp	1
				C389	Mycena abramsii	1
				C390	Mycena cinerella	1
				C391	Mycena galopus	1
				C392	Mycena sanguinolenta	1
				C393	Mycena seynii	2
				C394	Mycena sp	1
				C395	Mycenaceae sp	2
				C396	Mycocalicium victoriae	1
				C397	Mycopappus sp	1
				C398	Mycosphaerella punctiformis	2
				C399	Mycosphaerellaceae sp	5
				C400	Myriangium sp	1
				C401	Myxotrichaceae sp	1
				C402	Myxotrichum sp	1
				C403	Myxotrichum stipitatum	1
				C404	Naevala sp	2
				C405	Naganishia albida	2
				C406	Naganishia albidosimilis	2
				C407	Naganishia sp	2
				C408	Nakazawaea ernobii	1
				C409	Nectria dacryocarpa	1
				C410	Nectria sp	2
				C411	Nectriaceae sp	9
				C412	Nemania sp	1
				C413	Neocatenulostroma germanicum	1
				C414	Neocatenulostroma microsporum	1
				C415	Neofusicoccum australe	2
				C416	Neofusicoccum batangarum	1
				C417	Neofusicoccum eucalyptorum	1
				C418	Neofusicoccum kwambonambiense	1
				C419	Neofusicoccum luteum	2
				C420	Neofusicoccum parvum	2
				C421	Neofusicoccum sp	1
				C422	Neonectria fuckeliana	1
				C423	Neophaeomoniella zymoides	1
				C424	Neurospora intermedia	2
				C425	Neurospora tetrasperma	1
				C426	Occultifur externus	1
				C427	Ochrocladosporium frigidarii	1
				C428	Ochroconis sp	1
				C429	Oidiodendron cereale	1
				C430	Oidiodendron griseum	1
				C431	Oidiodendron sp	5
				C432	Onygenales sp	3
				C433	Ophiocordycepsinensis	2
				C434	Ophiostomataceae sp	1
				C435	Orbilia eucalypti	1
				C436	Orbiliaceae sp	2
				C437	Orbiliales sp	1
				C438	Paracamarosporium leucadendri	1
				C439	Paraconiothyrium brasiliense	1
				C440	Paraconiothyrium variabile	1
				C441	Paraphaeosphaeria sp	1
				C442	Parmastomycemollissimus	1
				C443	Parmotrema perlatum	1
				C444	Peltaster sp	2
				C445	Penicillium	1
				C446	Penicillium adametzioides	1
				C447	Penicillium alfredii	1
				C448	Penicillium atrosanguineum	1
				C449	Penicillium cairnsense	1
				C450	Penicillium camemberti	1
				C451	Penicillium catenatum	2
				C452	Penicillium chalabudae	1
				C453	Penicillium chrysogenum	1
				C454	Penicillium citreonigrum	2
				C455	Penicillium citrinum	2
				C456	Penicillium dierckxii	1
				C457	Penicillium digitatum	1
				C458	Penicillium glabrum	1
				C459	Penicillium meleagrinum var. viridiflavum	1
				C460	Penicillium miczynskii	1
				C461	Penicillium oxalicum	1
				C462	Penicillium pancosmium	2
				C463	Penicillium phoeniceum	1
				C464	Penicillium raistrickii	1
				C465	Penicillium roseopurpureum	1
				C466	Penicillium salmoniflumine	1
				C467	Penicillium solitum	2
				C468	Penicillium sp	16
				C469	Penicillium spinulosum	1
				C470	Penicillium steckii	1
				C471	Penicillium toxicarium	2
				C472	Peniophora lycii	1
				C473	Peniophora pini	1
				C474	Peniophora sp	1
				C475	Peniophoraceae sp	7
				C476	Peniophorella praetermissa	1
				C477	Periconia pseudobyssoides	1
				C478	Peroneutypa scoparia	2
				C479	Pestalotia cocculi	1
				C480	Pestalotiopsis citrina	1
				C481	Pestalotiopsis disseminata	2
				C482	Pestalotiopsis lespedezae	1
				C483	Pestalotiopsis maculans	1
				C484	Pestalotiopsis maculiformans	1
				C485	Pestalotiopsis microspora	1
				C486	Pestalotiopsis sp	3
				C487	Pezicula cinnamomea	1
				C488	Pezicula eucrita	2
				C489	Pezicula sp	2
				C490	Pezizales sp	1
				C491	Pezizomycotina	9
				C492	Phacidiopycnis washingtonensis	1
				C493	Phaeoacremonium amstelodamense	1
				C494	Phaeoacremonium fuscum	1
				C495	Phaeoacremonium minimum	1
				C496	Phaeoacremonium novae-zelandiae	1
				C497	Phaeoacremonium rubrigenum	2
				C498	Phaeoacremonium sp	1
				C499	Phaeococcomyces catenatus	1
				C500	Phaeococcomyces sp	2
				C501	Phaeomoniella sp	4
				C502	Phaeosphaeria podocarpi	1
				C503	Phaeosphaeria sp	1
				C504	Phaeosphaeriaceae sp	1
				C505	Phaeothecoidea sp	1
				C506	Phaeotremella sp	1
				C507	Phialea sp	1
				C508	Phialemoniopsis curvata	2
				C509	Phialemoniopsis sp	2
				C510	Phialemonium dimorphosporum	1
				C511	Phlebia rufa	1
				C512	Phoma herbarum	2
				C513	Phoma sp	8
				C514	Phomopsis asparagi	1
				C515	Phomopsis capsici	2
				C516	Phomopsis sp	6
				C517	Phomopsis vaccinii	1
				C518	Phomopsis velata	4
				C519	Pichia sp	2
				C520	Pilidiella sp	1
				C521	Piskurozyma sp	2
				C522	Plectania sp	1
				C523	Plectosphaerellaceae sp	1
				C524	Pleospora scirpicola	1
				C525	Pleospora sp	1
				C526	Pleosporaceae sp	12
				C527	Pleosporales sp	14
				C528	Pleurostoma richardsiae	1
				C529	Podosphaera leucotricha	1
				C530	Polyscytalum sp	1
				C531	Powellomyces sp	1
				C532	Prosthemium sp	1
				C533	Protomyces sp	1
				C534	Pseudobensingtonia ingoldii	1
				C535	Pseudocercosporella fraxini	1
				C536	Pseudogymnoascus pannorum	5
				C537	Pseudogymnoascus sp	2
				C538	Pseudohyphozyma bogoriensis	1
				C539	Pucciniales sp	1
				C540	Pucciniomycetes sp	1
				C541	Pycnopulvinus aurantiacus	1
				C542	Pycnora sp	1
				C543	Pyrenochaeta cava	4
				C544	Pyrenochaeta unguis-hominis	1
				C545	Pyronemataceae sp	1
				C546	Quambalaria cyanescens	2
				C547	Rachicladosporium pini	1
				C548	Ramularia eucalypti	1
				C549	Ramularia miae	1
				C550	Ramularia pratensis	1
				C551	Ramularia sp	2
				C552	Ramularia vizellae	1
				C553	Rhexocercosporidium sp	1
				C554	Rhinocladiella atrovirens	2
				C555	Rhinocladiella sp	1
				C556	Rhizopogon ellipsosporus	1
				C557	Rhizopogon sp	1
				C558	Rhizopuarrhizus	3
				C559	Rhizopumicrosporus	5
				C560	Rhizopus sp	1
				C561	Rhizosphaera kalkhoffii	2
				C562	Rhizosphaera macrospora	1
				C563	Rhodosporidios bolucolostri	2
				C564	Rhodosporidios boluruineniae	4
				C565	Rhodotorula araucariae	1
				C566	Rhodotorula glutinis	1
				C567	Rhodotorula mucilaginosa	5
				C568	Rhodotorula sp	5
				C569	Rhodotorula subericola	1
				C570	Rhodotorula terpenoidalis	2
				C571	Rhodoveronaea sp	1
				C572	Rhytismataceae sp	3
				C573	Rhytismatales sp	2
				C574	Rosasphaeria moravica	1
				C575	Rosellinia sp	1
				C576	Rosellinia thelena	1
				C577	Ruinenia dracophylli	2
				C578	Ruinenia rubra	1
				C579	Russulales sp	1
				C580	Rutstroemia firma	1
				C581	Saccharomyces sp	1
				C582	Saccharomycetaceae sp	2
				C583	Saccharomycetales sp	4
				C584	Saccharomycopsis fibuligera	1
				C585	Saitozyma podzolica	1
				C586	Sarcinomyces crustaceus	1
				C587	Sarcinomyces sp	1
				C588	Sarea difformis	1
				C589	Sarea sp	1
				C590	Sarocladium bacillisporum	1
				C591	Sarocladium strictum	2
				C592	Schizophyllum commune	2
				C593	Schwanniomyces capriottii	1
				C594	Scolecobasidium sp	1
				C595	Scopulariopsis sp	1
				C596	Sebacinales sp	3
				C597	Septoria sp	1
				C598	Setomelanomma holmii	1
				C599	Simplicillium aogashimaense	1
				C600	Sirobasidium brefeldianum	1
				C601	Sirococcus conigenus	1
				C602	Sistotrema brinkmannii	2
				C603	Sistotrema sp	3
				C604	Sistotremastrum sp	1
				C605	Sordariales sp	2
				C606	Sordariomycetes sp	5
				C607	Sphaeropsis sapinea	4
				C608	Sporidiobolales sp	2
				C609	Sporidiobolus pararoseus	1
				C610	Sporidiobolus sp	1
				C611	Sporobolomyces	1
				C612	Sporobolomyces oryzicola	1
				C613	Sporobolomyces sp	1
				C614	Sporothrix schenckii	1
				C615	Sporothrix sp	1
				C616	Stagonospora pseudopaludosa	1
				C617	Stemphylium herbarum	1
				C618	Stemphylium solani	2
				C619	Stereum hirsutum	2
				C620	Stereum sanguinolentum	1
				C621	Sterigmatomyces elviae	1
				C622	Strigula orbicularis	1
				C623	Strobilus ruesculentus	1
				C624	Stylonectria wegeliniana	1
				C625	Sydowia polyspora	8
				C626	Symmetrospora gracilis	1
				C627	Symmetrospora sp	1
				C628	Symmetrospora symmetrica	1
				C629	Sympodiomyces sp	1
				C630	Talaromyces allahabadensis	1
				C631	Talaromyces atroroseus	1
				C632	Talaromyces pinophilus	1
				C633	Talaromyces purpureogenus	1
				C634	Talaromyces radicus	1
				C635	Talaromyces ruber	1
				C636	Talaromyces sp	2
				C637	Talaromyces variabilis	3
				C638	Taphrina sp	2
				C639	Taphrinaceae sp	1
				C640	Taphrinales sp	3
				C641	Taphrinomycetes sp	1
				C642	Teichospora mariae	1
				C643	Teichospora rubriostiolata	1
				C644	Teloschistaceae sp	1
				C645	Teratosphaeriaceae sp	2
				C646	Therrya pini	1
				C647	Thyronectria balsamea	1
				C648	Thyronectria coryli	1
				C649	Thyronectria pinicola	1
				C650	Torula sp	1
				C651	Toxicocladosporium sp	1
				C652	Trameteversicolor	1
				C653	Trechisporales sp	1
				C654	Tremella encephala	2
				C655	Tremella foliacea	1
				C656	Tremella fuciformis	2
				C657	Tremella globispora	3
				C658	Tremella indecorata	1
				C659	Tremella moriformis	2
				C660	Tremella nivalis	1
				C661	Tremella roseotincta	1
				C662	Tremella sp	2
				C663	Tremellales sp	5
				C664	Tremellomycetes sp	29
				C665	Trichaptum abietinum	1
				C666	Trichocomaceae sp	2
				C667	Trichoderma atroviride	3
				C668	Trichoderma citrinum	1
				C669	Trichoderma harzianum	1
				C670	Trichoderma reesei	1
				C671	Trichoderma sp	5
				C672	Trichoderma tomentosum	1
				C673	Trichoderma viride	1
				C674	Tricholomataceae sp	2
				C675	Trichomerium foliicola	1
				C676	Trichomonascus ciferrii	1
				C677	Trichosporon asahii	1
				C678	Trichosporon dermatis	1
				C679	Trichosporon japonicum	1
				C680	Trichosporon mycotoxinovorans	1
				C681	Trichothecium roseum	5
				C682	Trichothecium sp	1
				C683	Trigonosporomyces hylophilus	1
				C684	Tumularia aquatica	1
				C685	Typhula sp	2
				C686	Udeniomycepyricola	1
				C687	Udeniomyces sp	1
				C688	Umbelopsis isabellina	3
				C689	Uncobasidium sp	4
				C690	Vaginatispora fuckelii	1
				C691	Valsa abietis	1
				C692	Valsa sordida	1
				C693	Venturia fraxini	1
				C694	Venturia sp	1
				C695	Venturiaceae sp	2
				C696	Venturiales sp	1
				C697	Verrucaria sp	1
				C698	Verticillium sp	1
				C699	Vishniacozyma foliicola	2
				C700	Vishniacozyma victoriae	3
				C701	Wallemia hederae	1
				C702	Wallemia sebi	1
				C703	Wallemia sp	15
				C704	Wickerhamomyces anomalus	1
				C705	Xylariaceae sp	1
				C706	Xylariales sp	2
				C707	Xylodon crustosus	1
				C708	Yarrowia lipolytica	1
				C709	Zalerion arboricola	2
				C710	Zasmidium sp	1
